# Supplementary material for: Bacterial Communities in the Sediments of Dianchi Lake, a Partitioned Eutrophic Waterbody in China
Source: PubMed Central journal article supplement (PMC3364273; doi:10.1371/journal.pone.0037796), 2012-05-30

Figure S2 Photo of freeze-dried sediments (Sampling in Dec. 2010)

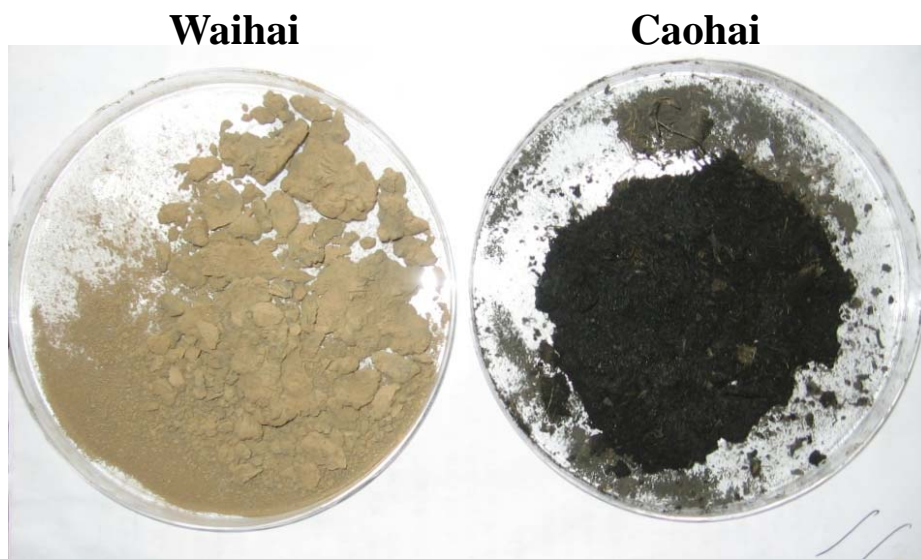

Supplement: pone.0037796.s002.pdf [file pone.0037796.s002.pdf]
