# Supplementary material for: Bacterial Communities in the Sediments of Dianchi Lake, a Partitioned Eutrophic Waterbody in China
Source: PubMed Central journal article supplement (PMC3364273; doi:10.1371/journal.pone.0037796), 2012-05-30

Figure S3 Rarefaction curve of pyrosequencing libraries

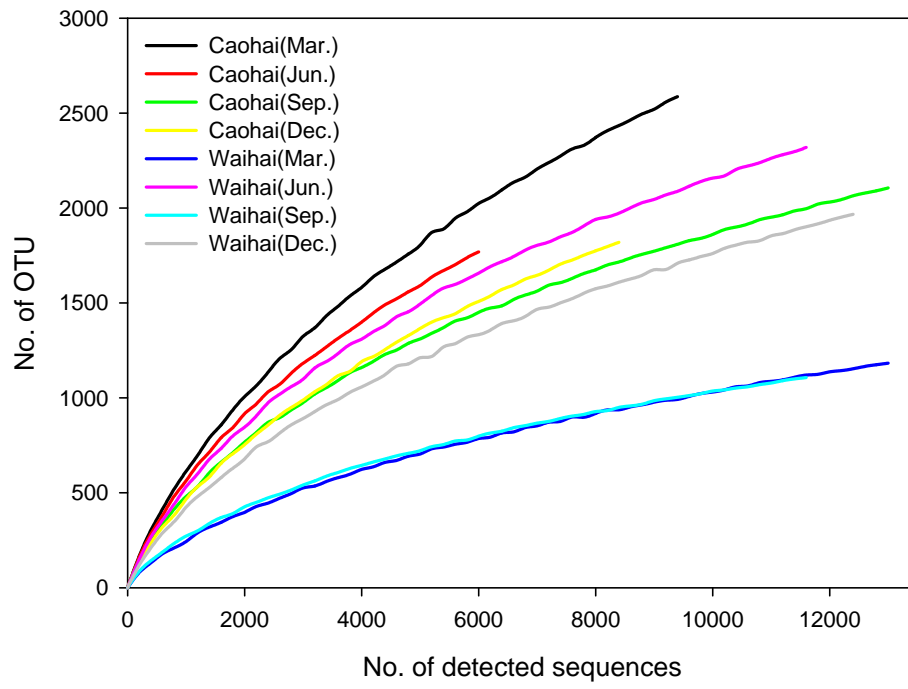

Supplement: pone.0037796.s003.pdf [file pone.0037796.s003.pdf]
