# Supplementary material for: Bacterial Communities in the Sediments of Dianchi Lake, a Partitioned Eutrophic Waterbody in China
Source: PubMed Central journal article supplement (PMC3364273; doi:10.1371/journal.pone.0037796), 2012-05-30

Figure S4 Hierarchical cluster analysis for barcoded pyrosequencing data based on Unweighted Pair Group Method using average linkage. The figure was plotted with FigTree software.

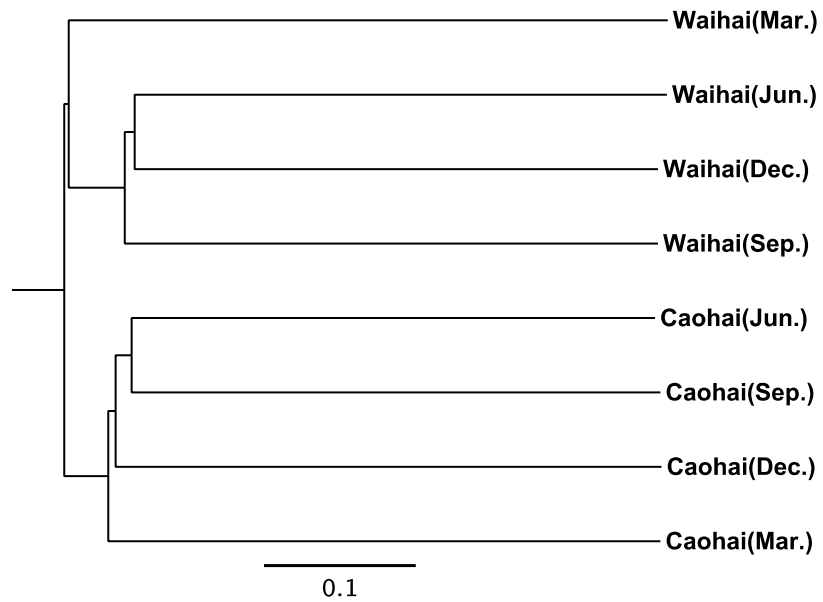

Supplement: pone.0037796.s004.pdf [file pone.0037796.s004.pdf]
