# Supplementary material for: Bacterial Communities in the Sediments of Dianchi Lake, a Partitioned Eutrophic Waterbody in China
Source: PubMed Central journal article supplement (PMC3364273; doi:10.1371/journal.pone.0037796), 2012-05-30
Supplement: pone.0037796.s006.pdf [file pone.0037796.s006.pdf]

Figure S6 Dendrogram for hierarchical cluster analysis based on group-average linking of Bray-Curtis similarities calculated from the binary (0 or 1) data of the (a) *amoA* and (b) *nosZ* gene T-RFLP profiles. The symbol CH represents Caohai and WH represents Waihai.

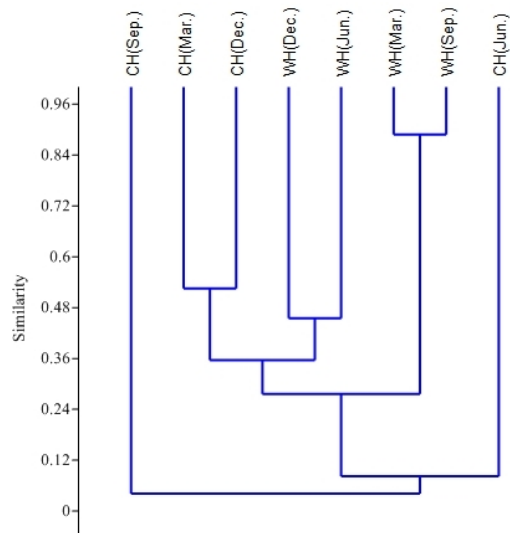

(a) *amoA*

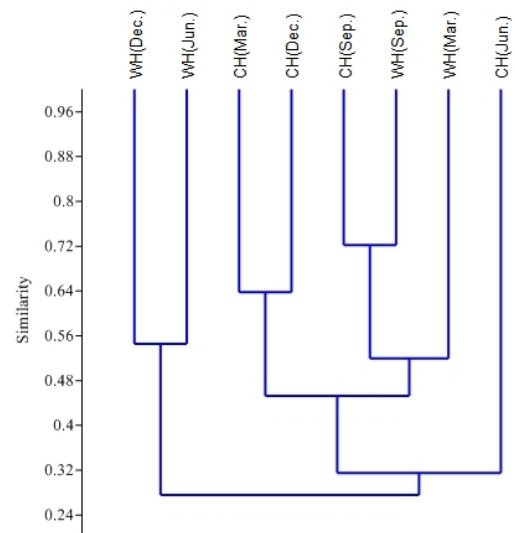

(b) *nosZ*
