# Supplementary material for: Bacterial Communities in the Sediments of Dianchi Lake, a Partitioned Eutrophic Waterbody in China
Source: PubMed Central journal article supplement (PMC3364273; doi:10.1371/journal.pone.0037796), 2012-05-30
Supplement: pone.0037796.s008.pdf [file pone.0037796.s008.pdf]

Figure S8 Phylogenetic trees with the *amoA* representative sequences (OTUs) from Dianchi Lake sediments (bold letter) and lakeshore water [6]. The numbers on the branch nodes represent percentage of bootstrap resamplings based on 1000 replicates (only  $\geq 50\%$  are shown). The scale bar indicates the number of nucleotide substitutions per site.

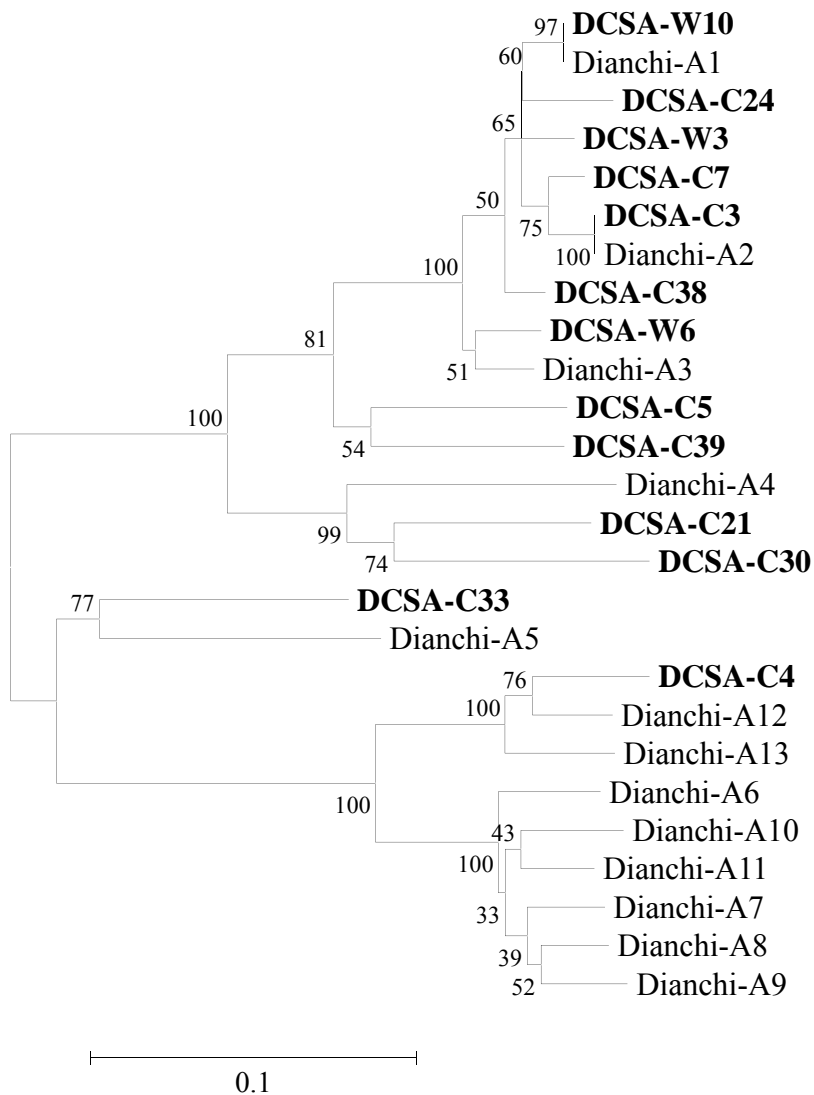

### Reference

6. Wen DH, Bai YH, Shi Q, Li ZX, Sun QH, et al. (2011) Bacterial diversity in the polluted water of the Dianchi Lakeshore in China. *Ann Microbiol* DOI 10.1007/s13213-011-0311-9.
