# Supplementary material for: Bacterial Communities in the Sediments of Dianchi Lake, a Partitioned Eutrophic Waterbody in China
Source: PubMed Central journal article supplement (PMC3364273; doi:10.1371/journal.pone.0037796), 2012-05-30
Supplement: pone.0037796.s009.pdf [file pone.0037796.s009.pdf]

Table S1 PCR primer pairs and thermal programs used in this study

| Target gene                 | Sequence (5'-3') of primer pairs                                                 | Thermal program                                                                                                                                                                                                                                                                                                                                                              | Reference |
|-----------------------------|----------------------------------------------------------------------------------|------------------------------------------------------------------------------------------------------------------------------------------------------------------------------------------------------------------------------------------------------------------------------------------------------------------------------------------------------------------------------|-----------|
| <i>amoA</i> (T-RFLP)        |                                                                                  | 5 min at 94°C, 30-35 cycles (depend on the concentration of template) of 60 s at 94°C, 90 s at 60°C, and 90 s at 72°C, and a final cycle consisting of 90 s at 60°C and 10 min at 72°C                                                                                                                                                                                       | [1]       |
| <i>amoA</i> (Clone library) | <i>amoA</i> -F: GGGGTTTCTACTGGTGGT<br><i>amoA</i> -R: CCCCTCKGSAAAGCCTTCTTC      | 5 min at 94°C, 35 cycles of 60 s at 94°C, 90 s at 60°C, and 90 s at 72°C, and a final cycle consisting of 90 s at 60°C and 10 min at 72°C.                                                                                                                                                                                                                                   | [1]       |
| <i>amoA</i> (qPCR)          |                                                                                  | 2 min at 95°C, followed by 40 cycles of 10 s at 94°C, 10 s at 55°C, and 30 s at 72°C.                                                                                                                                                                                                                                                                                        | [2]       |
| <i>nosZ</i> (T-RFLP)        | <i>nosZ</i> -F: CGYTGTTTCMTCGACAGCCAG<br><i>nosZ</i> -R: CATGTGCAGNGCRTGGCAGAA   | 3 min at 94°C, 1 cycle of 20 s at 94°C, 30 s at 65°C, 30 s at 72°C; 2 cycles of 20 s at 94°C, 30 s at 62°C, 35 s at 72°C; 3 cycles of 20 s at 94°C, 30 s at 59°C, 40 s at 72°C; 4 cycles of 20 s at 94°C, 30 s at 56°C, 45 s at 72°C; 5 cycles of 20 s at 94°C, 30 s at 53°C, 50 s at 72°C; 30 cycles of 20 s at 94°C, 45 s at 50°C, 1 min at 72°C; finally, 10 min at 72°C. | [3]       |
| <i>nosZ</i> (Clone library) | <i>nosZ</i> -F: CGCRACGGCAASAAGGTSMSSTG<br><i>nosZ</i> -R: CAKRTGCAKSGCRTGGCAGAA | 5 min at 95°C, 35 cycles of 30 s at 95°C, 30 s at 60°C, and 30 s at 72°C, followed by 10 min at 72°C.                                                                                                                                                                                                                                                                        |           |
| <i>nosZ</i> (qPCR)          |                                                                                  | 2 min at 95°C, 40 cycles of 10 s at 95°C, 40 s at 60°C.                                                                                                                                                                                                                                                                                                                      | [4]       |
| 16S rRNA (qPCR)             | 341F: CCTACGGGAGGCAGCAG<br>518R: ATTACCGCGGCTGCTGG                               | 2 min at 95°C, 40 cycles of 10 s at 95°C, 40 s at 60°C.                                                                                                                                                                                                                                                                                                                      | [5]       |

## References

1. Rotthauwe JH, Witzel KP, Liesack W (1997) The ammonia monooxygenase structural gene *amoA* as a functional marker: Molecular fine-scale analysis of natural ammonia-oxidizing populations. *Appl Environ Microbiol* 63: 4704-4712.
2. Chen XP, Zhu YG, Xia Y, Shen JP, He JZ (2008) Ammonia-oxidizing archaea: important players in paddy rhizosphere soil? *Environ Microbiol* 10: 1978-1987.
3. Rösch C, Mergel A, Bothe H (2002) Biodiversity of denitrifying and dinitrogen-fixing bacteria in an acid forest soil. *Appl Environ Microbiol* 68: 3818-3829.
4. Kong AYY, Hristova K, Scow KM, Six J (2010) Impacts of different N management regimes on nitrifier and denitrifier communities and N cycling in soil microenvironments. *Soil Biol Biochem* 42: 1523-1533.
5. He S, Gall DL, McMahon KD (2007) "*Candidatus accumulibacter*" population structure in enhanced biological phosphorus removal Sludges as revealed by polyphosphate kinase genes. *Appl Environ Microbiol* 73: 5865-5874.
