# Supplementary material for: Bacterial Communities in the Sediments of Dianchi Lake, a Partitioned Eutrophic Waterbody in China
Source: PubMed Central journal article supplement (PMC3364273; doi:10.1371/journal.pone.0037796), 2012-05-30
Supplement: pone.0037796.s010.pdf [file pone.0037796.s010.pdf]

Table S2 Physico-chemical characteristics of the sediments of Dianchi Lake

| Sample        | Water content | Temperature (°C) | pH  | TOC (mg/g) | NH <sub>3</sub> -N (mg/g) | NO <sub>3</sub> <sup>-</sup> -N (mg/g) | NO <sub>2</sub> <sup>-</sup> -N (mg/g) |
|---------------|---------------|------------------|-----|------------|---------------------------|----------------------------------------|----------------------------------------|
| Caohai(Mar.)  | 82.3%         | 15.8             | 6.2 | 514.8      | 49.0                      | 625.3                                  | 2.4                                    |
| Caohai(Jun.)  | 91.5%         | 22.9             | 6.2 | 1428.4     | 90.0                      | 441.4                                  | 2.3                                    |
| Caohai(Sept.) | 91.4%         | 21.8             | 6.4 | 9932.3     | 178.9                     | 1113.2                                 | 7.7                                    |
| Caohai(Dec.)  | 88.1%         | 10.6             | 6.4 | 10915.0    | 389.2                     | 1732.1                                 | 16.6                                   |
| Waihai(Mar.)  | 63.8%         | 15.5             | 6.2 | 350.0      | 58.6                      | 1095.3                                 | 1.1                                    |
| Waihai (Jun.) | 79.1%         | 22.3             | 6.4 | 450.5      | 118.7                     | 568.2                                  | 0.6                                    |
| Waihai (Sep.) | 86.7%         | 21.6             | 6.4 | 575.4      | 143.0                     | 1291.4                                 | 10.9                                   |
| Waihai (Dec.) | 65.0%         | 10.5             | 6.2 | 965.5      | 359.0                     | 2795.2                                 | 12.2                                   |
