# Supplementary material for: Bacterial Communities in the Sediments of Dianchi Lake, a Partitioned Eutrophic Waterbody in China
Source: PubMed Central journal article supplement (PMC3364273; doi:10.1371/journal.pone.0037796), 2012-05-30
Supplement: pone.0037796.s011.pdf [file pone.0037796.s011.pdf]

Table S3 Library coverage estimations and sequence diversity of *amoA* and *nosZ*

| Sample                | No. of clones<br>sequenced | No. of filtered<br>sequences | No. of OTU<br>(>98% identity) | % Coverage | Chao 1 value | Shannon index |
|-----------------------|----------------------------|------------------------------|-------------------------------|------------|--------------|---------------|
| Caohai( <i>amoA</i> ) | 50                         | 49                           | 12                            | 85.7%      | 19(13, 49)   | 1.53          |
| Caohai( <i>nosZ</i> ) | 50                         | 38                           | 28                            | 42.1%      | 85(47, 207)  | 3.21          |
| Waohai( <i>amoA</i> ) | 50                         | 50                           | 3                             | 98.0%      | 3(3, 0)      | 0.32          |
| Waohai( <i>nosZ</i> ) | 50                         | 30                           | 15                            | 70.0%      | 24(17, 55)   | 2.45          |

Library coverage was calculated as  $C=1-n/N$ , where  $n$  is the number of OTUs without a replicate, and  $N$  is the total number of sequences. The Shannon index =  $-\sum p_i \ln p_i$ , where  $p_i = n_i/N$ ,  $n_i$  is the number of OTUs with  $i$  individuals, and  $N$  is the total number of individuals. The numbers in parentheses are lower and upper 95% confidence intervals for the Chao 1 estimators.
