# Supplementary material for: Bacterial Communities in the Sediments of Dianchi Lake, a Partitioned Eutrophic Waterbody in China
Source: PubMed Central journal article supplement (PMC3364273; doi:10.1371/journal.pone.0037796), 2012-05-30
Supplement: pone.0037796.s012.pdf [file pone.0037796.s012.pdf]

Table S4. Correlations between richness (Chao 1 values), diversity (Shannon index), abundance of 16S rRNA, *amoA*, *nosZ* (qPCR) and sediment properties.

|                                 | Richness | Diversity | Abundance                             |                                          |                                          |
|---------------------------------|----------|-----------|---------------------------------------|------------------------------------------|------------------------------------------|
|                                 |          |           | Log <sub>10</sub> <sup>16S rRNA</sup> | Log <sub>10</sub> <sup><i>amoA</i></sup> | Log <sub>10</sub> <sup><i>nosZ</i></sup> |
| pH                              | -0.218   | -0.109    | 0.109                                 | -0.218                                   | 0.109                                    |
| TOC                             | 0.119    | 0.167     | <b>0.738*</b>                         | 0.333                                    | 0.619                                    |
| NH <sub>3</sub> -N              | -0.357   | -0.333    | 0.190                                 | -0.214                                   | 0.024                                    |
| NO <sub>3</sub> <sup>-</sup> -N | -0.619   | -0.619    | -0.286                                | -0.548                                   | -0.381                                   |
| NO <sub>2</sub> <sup>-</sup> -N | -0.286   | -0.262    | 0.167                                 | -0.143                                   | 0.119                                    |
| Temperature                     | 0.381    | 0.524     | 0.381                                 | 0.357                                    | 0.429                                    |

Significance at \* $\alpha$ = 0.05 level
