# Supplementary material for: Bacterial Communities in the Sediments of Dianchi Lake, a Partitioned Eutrophic Waterbody in China
Source: PubMed Central journal article supplement (PMC3364273; doi:10.1371/journal.pone.0037796), 2012-05-30
Supplement: pone.0037796.s013.pdf [file pone.0037796.s013.pdf]

Table S5 Correlations between the relative abundances of the most abundant bacterial phyla and proteobacterial classes and the soil properties in Caohai and Waihai sediments.

|                              | Temperature    | pH     | TOC            | NH <sub>3</sub> +NO <sub>2</sub> <sup>-</sup> -N+NO <sub>3</sub> <sup>-</sup> -N |
|------------------------------|----------------|--------|----------------|----------------------------------------------------------------------------------|
| <i>Acidobacteria</i>         | 0.286          | 0.000  | -0.310         | -0.310                                                                           |
| <i>Actinobacteria</i>        | -0.027         | -0.375 | <b>-0.791*</b> | -0.518                                                                           |
| <i>Bacteroidetes</i>         | -0.048         | -0.109 | <b>0.714*</b>  | -0.095                                                                           |
| <i>Chloroflexi</i>           | 0.071          | -0.109 | -0.262         | -0.190                                                                           |
| <i>Firmicutes</i>            | -0.643         | -0.109 | -0.167         | 0.690                                                                            |
| <i>Planctomycetes</i>        | -0.245         | -0.375 | -0.355         | -0.082                                                                           |
| <i>Alphaproteobacteria</i>   | 0.429          | 0.218  | <b>0.762*</b>  | -0.286                                                                           |
| <i>Betaproteobacteria</i>    | <b>-0.833*</b> | -0.436 | -0.048         | 0.452                                                                            |
| <i>Deltaproteobacteria</i>   | 0.262          | -0.218 | -0.381         | -0.262                                                                           |
| <i>Epsilonproteobacteria</i> | -0.366         | 0.112  | -0.220         | 0.195                                                                            |
| <i>Gammaproteobacteria</i>   | <b>0.738*</b>  | 0.546  | 0.357          | -0.238                                                                           |
| Unclassified                 | -0.024         | 0.165  | 0.036          | -0.096                                                                           |
| <i>Proteobacteria</i>        |                |        |                |                                                                                  |
| Unclassified bacteria        | 0.524          | -0.109 | -0.048         | -0.405                                                                           |

Significance at \* $\alpha=0.05$  level
